# Supplementary material
Source: Springer Nature journal article supplement (https://www.springermedizin.de/resource/supplementary/12985_2011_1371_MOESM3_ESM.pdf/9609660)

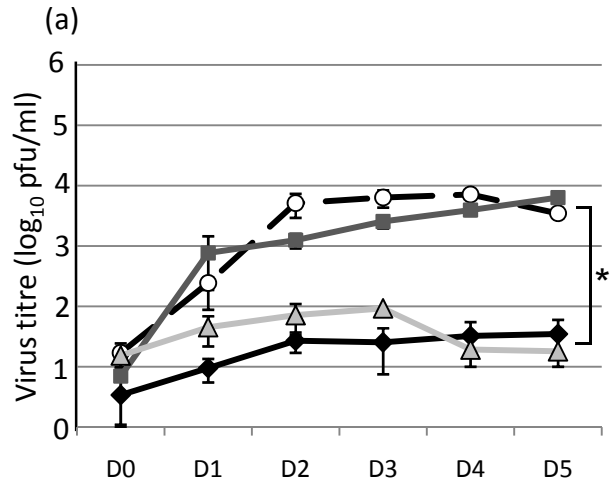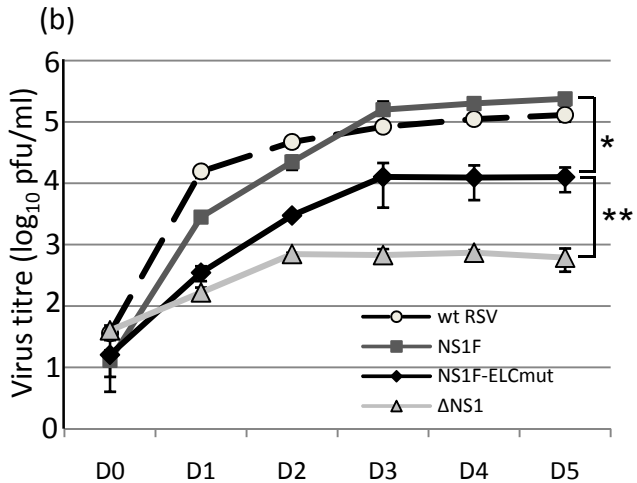

Supplement: MOESM3 [file 9609660]
